# Supplementary material for: Adhesion enhancement of ink-jet printed conductive copper patterns on a flexible substrate
Source: Royal Society of Chemistry journal article supplement (doi:10.1039/c2jm31381b), 2012-01-01
Supplement: c2jm31381b.pdf [file c2jm31381b.pdf]

## Supplementary Materials

### Adhesion enhancement of ink-jet printed conductive copper patterns on a flexible substrate

By Young-In Lee and Yong-Ho Choa\*

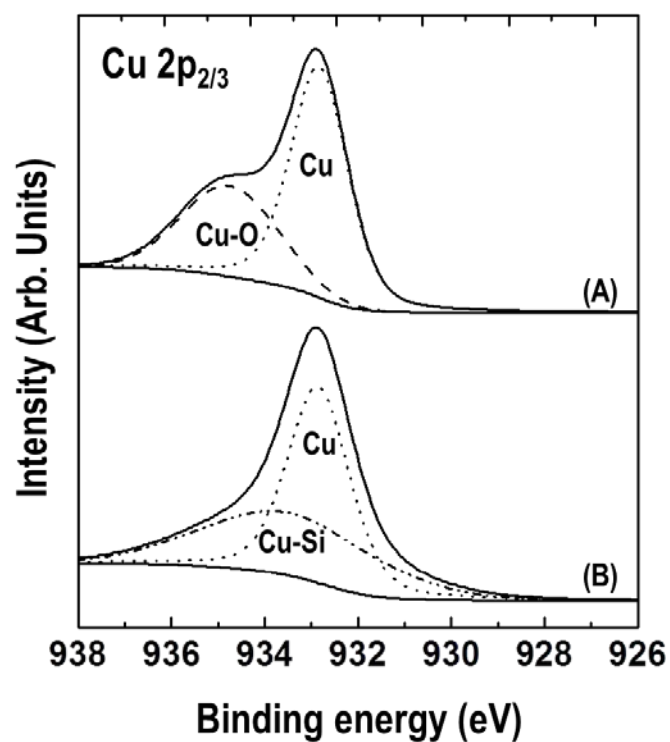

**Fig. S1.** XPS spectra showing Cu 2p<sub>3/2</sub> states in ink-jet printed Cu films fabricated from Cu complex ion ink (A) without and (B) with APS.
